# Supplementary material
Source: Springer Nature journal article supplement (https://www.springermedizin.de/resource/supplementary/12904_2012_126_MOESM1_ESM.pdf/9517572)

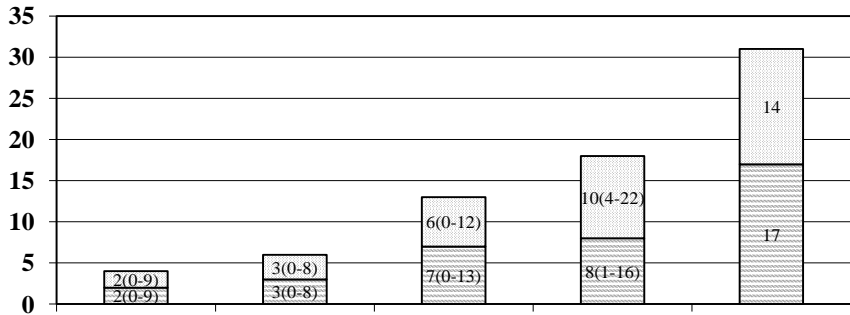

**Domain I**

**Domain II-V**

Overall unbearable suffering

Supplement: MOESM1 [file 9517572]
